# Supplementary material
Source: PubMed Central journal article supplement (PMC5663364)
Supplement: jci-127-92876-s001.pdf [file jci-127-92876-s001.pdf]

**SUPPLEMENTAL TABLES, METHODS AND FIGURES**

**SRP54 mutations cause syndromic neutropenia with Shwachman-Diamond-like features**

Raphael Carapito<sup>1,2,3\*</sup>, Martina Konantz<sup>4\*</sup>, Catherine Paillard<sup>1,2,5\*</sup>, Zhichao Miao<sup>6</sup>, Angélique Pichot<sup>1,2</sup>, Magalie S. Leduc<sup>7,8</sup>, Yaping Yang<sup>7</sup>, Katie L. Bergstrom<sup>9</sup>, Donald H. Mahoney<sup>9</sup>, Deborah L. Shardy<sup>9</sup>, Ghada Alsaleh<sup>1,2</sup>, Lydie Naegely<sup>1,2</sup>, Aline Kolmer<sup>1,2</sup>, Nicodème Paul<sup>1,2</sup>, Antoine Hanauer<sup>1,2</sup>, Véronique Rolli<sup>1,2,3</sup>, Joëlle S. Müller<sup>4</sup>, Elisa Alghisi<sup>4</sup>, Loïc Sauter<sup>4</sup>, Cécile Macquin<sup>1,2</sup>, Aurore Morlon<sup>10</sup>, Consuelo Sebastia Sancho<sup>11</sup>, Patrizia Amati-Bonneau<sup>12,13</sup>, Vincent Procaccio<sup>12,13</sup>, Anne-Laure Mosca-Boidron<sup>14</sup>, Nathalie Marle<sup>14</sup>, Naël Osmani<sup>1</sup>, Olivier Lefebvre<sup>1</sup>, Jacky G. Goetz<sup>1</sup>, Sule Unal<sup>15</sup>, Nurten A. Akarsu<sup>16</sup>, Mirjana Radosavljevic<sup>1,2,3</sup>, Marie-Pierre Chenard<sup>17</sup>, Fanny Rialland<sup>18</sup>, Audrey Grain<sup>18</sup>, Marie-Christine Béné<sup>19</sup>, Marion Eveillard<sup>19</sup>, Marie Vincent<sup>20</sup>, Julien Guy<sup>21</sup>, Laurence Faivre<sup>22</sup>, Christel Thauvin-Robinet<sup>22</sup>, Julien Thevenon<sup>22</sup>, Kasiani Myers<sup>23</sup>, Mark D. Fleming<sup>24</sup>, Akiko Shimamura<sup>25</sup>, Elodie Bottollier-Lemallaz<sup>26</sup>, Eric Westhof<sup>6</sup>, Claudia Lengerke<sup>4,27\*</sup>, Bertrand Isidor<sup>20,28\*</sup>, Seiamak Bahram<sup>1,2,3\*</sup>

**SUPPLEMENTAL TABLES****Supplemental Table 1 : Clinical characteristics of the patients**

|                                                                                    | All.1                                                               | BII.1                                                  | CII.1                         | « Classical » Shwachman-Diamond syndrome <sup>A</sup> |
|------------------------------------------------------------------------------------|---------------------------------------------------------------------|--------------------------------------------------------|-------------------------------|-------------------------------------------------------|
| <b>Hematologic manifestations</b>                                                  |                                                                     |                                                        |                               |                                                       |
| <b>Blood</b>                                                                       |                                                                     |                                                        |                               |                                                       |
| Absolute neutrophil count, 10 <sup>9</sup> /L (normal: 1.7–9.7) <sup>B</sup>       | 0 - 0.28                                                            | 0 - 0.19                                               | 0 - 2.92                      | 90% display neutropenia (46% severe, <0.5)            |
| Hemoglobin, g/dL (normal: 11.5–15.5) <sup>C</sup>                                  | 15.8                                                                | 8.0                                                    | 10.6                          | 46% have anemia                                       |
| Platelets, 10 <sup>9</sup> /L (normal: 150–450) <sup>D</sup>                       | 265                                                                 | 231                                                    | 342                           | 42% have thrombocytopenia                             |
| Allo-immunization against neutrophils/granulocytes                                 | no                                                                  | no                                                     | no                            | no                                                    |
| <b>Bone marrow<sup>3</sup></b>                                                     |                                                                     |                                                        |                               |                                                       |
| Biopsy cellularity, %                                                              | 70                                                                  | 40                                                     | 80                            | variable                                              |
| Erythrocytic lineage, % (normal: 10-32)                                            | 11                                                                  | 5                                                      | 32                            | variable                                              |
| Neutrophil lineage, % (normal: 30-70)                                              | 5                                                                   | 21                                                     | 0                             | variable                                              |
| Lymphoid lineage, % (normal: 6-25)                                                 | 48                                                                  | 62                                                     | 40                            | variable                                              |
| Maturation retardation at promyelocytic stage                                      | yes                                                                 | yes                                                    | yes                           | no                                                    |
| Ring sideroblast (iron staining)                                                   | no                                                                  | no                                                     | no                            | no                                                    |
| Cytoplasmic vacuoles in myeloblasts/promyelocytes                                  | yes                                                                 | yes                                                    | no                            | no                                                    |
| <b>Treatment</b>                                                                   |                                                                     |                                                        |                               |                                                       |
| G-CSF                                                                              | Yes, absence of effect                                              | Yes, absence of effect                                 | Yes, response at 5 mcg/kg QOD | +/-                                                   |
| Hematopoietic cell transplantation                                                 | At 4 years of age, genodetical unrelated allogeneic transplantation | At 1 year of age, unrelated cord blood transplantation | No                            | +/-                                                   |
| <b>Pancreatic dysfunction</b>                                                      |                                                                     |                                                        |                               | 98% of patients                                       |
| Diarrhea /constipation                                                             | Intermittent diarrhea                                               | no                                                     | constipation                  | yes                                                   |
| Feeding difficulties                                                               | yes                                                                 | yes                                                    | no                            | +/-                                                   |
| Steatorrhea (normal: 1-3 g/24 h)                                                   | 3.4 - 4                                                             | normal                                                 | normal                        | +/-                                                   |
| Fecal elastase (normal: > 200 µg/g of stool)                                       | < 15                                                                | < 15                                                   | > 500                         | Usually low                                           |
| Lipase (normal: 25-110 U/L)                                                        | 9                                                                   | 35                                                     | 33                            | Usually low                                           |
| Total amylase (normal: All.1: 30-119 U/L; BII.1: 1-47 U/L; CII.1: 30-110 U/L)      | 39                                                                  | 4                                                      | 39                            | Usually low                                           |
| Pancreatic isoamylase (normal: All.1: 8-34 U/L; BII.1: 2-28 U/L; CII.1: 12-52 U/L) | N/A <sup>E</sup>                                                    | N/A                                                    | 16                            | Below norm if >age 3years                             |
| Pancreatic Enzyme Replacement Therapy                                              | Creon <sup>®</sup> (12 000 UI/day) for life                         | no                                                     | no                            | +/- pancreatic enzyme supplementation                 |
| <b>Neurological manifestations</b>                                                 |                                                                     |                                                        |                               |                                                       |
| Autism spectrum disorder                                                           | yes                                                                 | N/A (mild neuropsychological)                          | yes                           | +/-                                                   |

| symptoms observed but not autism before patient's death at 16 months) |                                                                                                                                  |                                                                                                                                  |                                                                                                                                                                                                          |                               |
|-----------------------------------------------------------------------|----------------------------------------------------------------------------------------------------------------------------------|----------------------------------------------------------------------------------------------------------------------------------|----------------------------------------------------------------------------------------------------------------------------------------------------------------------------------------------------------|-------------------------------|
| <b>Skeletal manifestations</b>                                        |                                                                                                                                  |                                                                                                                                  |                                                                                                                                                                                                          | 70% of patients               |
| Short stature                                                         | yes                                                                                                                              | yes                                                                                                                              | initial height 13%ile, on GCSF 30%ile                                                                                                                                                                    | 66% of patients               |
| Metaphysal dysostosis                                                 | no                                                                                                                               | no                                                                                                                               | no                                                                                                                                                                                                       | 53% of patients               |
| Bone demineralization                                                 | no                                                                                                                               | yes                                                                                                                              | no (normal prior to G-CSF)                                                                                                                                                                               | yes                           |
| <b>Other manifestations</b>                                           |                                                                                                                                  |                                                                                                                                  |                                                                                                                                                                                                          |                               |
| Liver (elevated transaminases)                                        | no                                                                                                                               | yes                                                                                                                              | no                                                                                                                                                                                                       | 61% of cases                  |
| Cardiovascular manifestations                                         | inter-auricular and inter-ventricular septal defects                                                                             | N/A                                                                                                                              | no                                                                                                                                                                                                       | +/-                           |
| Rib cage abnormalities                                                | Yes, <i>pectus carinatum</i>                                                                                                     | no                                                                                                                               | no                                                                                                                                                                                                       | yes                           |
| Teeth abnormalities                                                   | Small teeth                                                                                                                      | no                                                                                                                               | no                                                                                                                                                                                                       | +/-                           |
| Other                                                                 | low set asymmetric ears, thinning hair, frontal angioma, mandibular microretrognathism, high arched palate                       | N/A                                                                                                                              | premature adrenarache, XR bone age hand & wrist 2.5 SD advanced                                                                                                                                          | variable congenital anomalies |
| <b>Other features with normal results</b>                             |                                                                                                                                  |                                                                                                                                  |                                                                                                                                                                                                          |                               |
| Clinical examination                                                  | Cerebral MRI                                                                                                                     | Cerebral MRI, abdominal and cardiac echographies                                                                                 | XR skeletal survey                                                                                                                                                                                       | -                             |
| Genetic testing                                                       | CGH array (180k Agilent), mitochondrial DNA sequencing, targeted sequencing of SBDS, NGS sequencing of a panel of 18 IBMFs genes | CGH array (180k Agilent), mitochondrial DNA sequencing, targeted sequencing of SBDS, NGS sequencing of a panel of 18 IBMFs genes | chromosomal microarray (CMA v7.2 105k), targeted sequencing of <i>SBDS</i> , <i>HAX1</i> , <i>WAS</i> and <i>COL11A1</i> , Fragile X repeats and sequencing, NGS sequencing of a panel of 21 IBMFs genes | -                             |
| <b>Outcome</b>                                                        | Alive, 6 years of age                                                                                                            | Died, 16 months                                                                                                                  | Alive, 18 years of age                                                                                                                                                                                   | -                             |

<sup>A</sup> extracted from a meta-analysis reported in Table 7-7 in Orkin et al. 2015.

<sup>B</sup> Observed range during evaluation of neutropenia, prior to treatment with G-CSF

<sup>C</sup> Mean values

<sup>D</sup> Measured pre-transplantation in the transplanted patients AII.1 and BII.1

<sup>E</sup> Information not available

#### Reference:

Orkin SH, Nathan DG, Ginsburg D, Look AT, Fisher DE, and Lux S. *Nathan and Oski's Hematology and Oncology of Infancy and Childhood*. 2015.

Supplemental Table 2. Filtered variants uncovered by trio whole exome sequencing in family A, B and C

|                                                          | Family | Gene name                 | Transcript | Exon/Intron | Chrom. | Position  | cDNA            | Amino acid | Zygo-sity | Inheritance | Category   | References                                                                  | Disease                                                                                                         | Inheritance |
|----------------------------------------------------------|--------|---------------------------|------------|-------------|--------|-----------|-----------------|------------|-----------|-------------|------------|-----------------------------------------------------------------------------|-----------------------------------------------------------------------------------------------------------------|-------------|
| Variants related to the patient's clinical phenotype     | C      | <i>DFNA5</i>              | NM_004403  | exon8       | 7      | 24745812  | c.1173_1174insC | p.A392fs   | Het       | Father      | Pathogenic | Seen in ExAc database                                                       | Deafness, autosomal dominant 5 [MIM:600994]                                                                     | AD          |
|                                                          | C      | <i>CDH23</i>              | NM_022124  | exon26      | 10     | 73468926  | c.3178C>T       | p.R1060W   | Het       | Father      | VUS        | PMID 12075507, 24082139, 16679490; rs201536811; In trans with [c.8065-5C>A] | Deafness, autosomal recessive 12 [MIM:601386]; Usher syndrome, type 1D [MIM:601067]                             | AD/AR       |
|                                                          | C      | <i>CDH23</i>              | NM_022124  | intron54    | 10     | 73565920  | c.8065-5C>A     | N/A        | Het       | Mother      | VUS        | Seen in ExAc database; In trans with [p.R1060W]                             | Deafness, autosomal recessive 12 [MIM:601386]; Usher syndrome, type 1D [MIM:601067]                             | AD/AR       |
| <i>de novo</i> variants in non disease-causing genes     | A      | <i>SRP54</i>              | NM_003136  | exon8       | 14     | 35482592  | c.677G>A        | p.G226E    | Het       | De novo     | N/A        | Novel variant                                                               | N/A                                                                                                             | N/A         |
|                                                          | B      | <i>SRP54</i>              | NM_003136  | exon4       | 14     | 35476576  | c.343A>G        | p.T115A    | Het       | De novo     | N/A        | Novel variant                                                               | N/A                                                                                                             | N/A         |
|                                                          | C      | <i>OXA1L</i> <sup>A</sup> | NM_005015  | exon10      | 14     | 23240651  | c.1372C>T       | p.R458X    | Het       | De novo     | N/A        | Novel variant                                                               | N/A                                                                                                             | N/A         |
|                                                          | C      | <i>SRP54</i>              | NM_003136  | exon4       | 14     | 35476574  | c.349_351del    | p.T117del  | Het       | De novo     | N/A        | Novel variant                                                               | N/A                                                                                                             | N/A         |
| Compound heterozygous variants                           | A      | <i>RELN</i>               | NM_005045  | exon34      | 7      | 103205868 | c.5067C>A       | p.N1689K   | Het       | Father      | N/A        | Novel variant                                                               | Lissencephaly 2 [MIM:257320]; Epilepsy [MIM:616436]                                                             | AR/AD       |
|                                                          | A      | <i>RELN</i>               | NM_005045  | exon30      | 7      | 103214590 | c.4460G>T       | p.G1487V   | Het       | Mother      | N/A        | Novel variant                                                               | Lissencephaly 2 [MIM:257320]; Epilepsy [MIM:616436]                                                             | AR/AD       |
| In genes not related to the patient's clinical phenotype | C      | <i>COL6A3</i>             | NM_004369  | exon38      | 2      | 238249550 | c.8009C>T       | p.A2670V   | Het       | Father      | N/A        | PMID 25380242; rs142851023                                                  | Bethlem myopathy 1 [MIM:158810]; Dystonia 27 [MIM:616411]; Ullrich congenital muscular dystrophy 1 [MIM:254090] | AD/AR       |
|                                                          | C      | <i>COL6A3</i>             | NM_004369  | exon38      | 2      | 238249370 | c.8189C>A       | p.A2730D   | Het       | Mother      | N/A        | rs138466455                                                                 | Bethlem myopathy 1 [MIM:158810]; Dystonia 27 [MIM:616411]; Ullrich congenital muscular dystrophy 1 [MIM:254090] | AD/AR       |
| In non disease-causing genes                             | B      | <i>A2ML1</i>              | NM_144670  | exon8       | 12     | 8990121   | c.814C>T        | p.R272W    | Het       | Father      | N/A        | rs201215628                                                                 | N/A                                                                                                             | N/A         |
|                                                          | B      | <i>A2ML1</i>              | NM_144670  | exon30      | 12     | 9020598   | c.3878A>G       | p.N1293S   | Het       | Mother      | N/A        | rs201478459                                                                 | N/A                                                                                                             | N/A         |

|                            |   |                            |              |        |    |           |            |          |     |        |     |                                                     |                                                                                            |          |
|----------------------------|---|----------------------------|--------------|--------|----|-----------|------------|----------|-----|--------|-----|-----------------------------------------------------|--------------------------------------------------------------------------------------------|----------|
|                            | B | <i>SLC12A4</i>             | NM_001145962 | exon18 | 16 | 67980085  | c.2602C>T  | p.R868C  | Het | Father | N/A | Seen in ExAc database                               | N/A                                                                                        | N/A      |
|                            | B | <i>SLC12A4</i>             | NM_001145962 | exon9  | 16 | 67984928  | c.1339C>T  | p.R447C  | Het | Mother | N/A | rs200784647                                         | N/A                                                                                        | N/A      |
|                            | C | <i>CCDC168</i>             | NM_001146197 | exon4  | 13 | 103399761 | c.3286C>A  | p.P1096T | Het | Mother | N/A | rs143261898; in trans with [p.Y4116N]               | N/A                                                                                        | N/A      |
|                            | C | <i>CCDC168</i>             | NM_001146197 | exon4  | 13 | 103390701 | c.12346T>A | p.Y4116N | Het | Father | N/A | rs201767274; in trans with [p.P1096T]               | N/A                                                                                        | N/A      |
|                            | C | <i>CFAP46</i>              | NM_001200049 | exon12 | 10 | 134736204 | c.1265C>T  | p.T422M  | Het | Father | N/A | rs140185143; in trans with [p.R2657C]               | N/A                                                                                        | N/A      |
|                            | C | <i>CFAP46</i>              | NM_001200049 | exon58 | 10 | 134622104 | c.7969C>T  | p.R2657C | Het | Mother | N/A | rs148457914; in trans with [p.T422M]                | N/A                                                                                        | N/A      |
|                            | C | <i>CNDP2</i>               | NM_018235    | exon2  | 18 | 72167187  | c.-22C>T   | N/A      | Het | Father | N/A | Novel variant; in trans with [p.A465T]              | N/A                                                                                        | N/A      |
|                            | C | <i>CNDP2</i>               | NM_018235    | exon12 | 18 | 72187268  | c.1393G>A  | p.A465T  | Het | Mother | N/A | rs144157993; in trans with [c.-22C>T]               | N/A                                                                                        | N/A      |
|                            | C | <i>MDM4</i>                | NM_002393    | exon11 | 1  | 204518457 | c.1120A>C  | p.K374Q  | Het | Father | N/A | PMID 25996639; rs41299595; in trans with [c.-22C>T] | N/A                                                                                        | N/A      |
|                            | C | <i>MDM4</i>                | NM_001278516 | exon6  | 1  | 204507384 | c.459C>T   | p.D153D  | Het | Mother | N/A | Seen in ExAc database; in trans with [c.-22C>T]     | N/A                                                                                        | N/A      |
| <b>Hemizygous variants</b> |   |                            |              |        |    |           |            |          |     |        |     |                                                     |                                                                                            |          |
|                            | C | <i>ANOS1</i>               | NM_000216    | exon2  | X  | 8667780   | c.214G>A   | p.G72S   | Hem | Mother | N/A | rs186630563                                         | Hypogonadotropic hypogonadism 1 with or without anosmia (Kallmann syndrome 1) [MIM:308700] | X-linked |
|                            | C | <i>MAGEB17<sup>B</sup></i> | NM_001277307 | exon2  | X  | 16189074  | c.569T>A   | p.L190X  | Hem | Mother | N/A | Novel variant                                       | N/A                                                                                        | N/A      |
|                            | C | <i>YY2</i>                 | NM_206923    | exon1  | X  | 21875099  | c.497C>T   | p.T166M  | Hem | Mother | N/A | Novel variant                                       | N/A                                                                                        | N/A      |
|                            | C | <i>DCAF8L2</i>             | NM_001136533 | exon1  | X  | 27765065  | c.53G>A    | p.S18N   | Hem | Mother | N/A | rs183301101                                         | N/A                                                                                        | N/A      |
|                            | C | <i>RGAG4</i>               | NM_001024455 | exon1  | X  | 71350598  | c.793T>G   | p.L265V  | Hem | Mother | N/A | Seen in ExAc database                               | N/A                                                                                        | N/A      |
|                            | C | <i>ZXDA</i>                | NM_007156    | exon1  | X  | 57936736  | c.119C>T   | p.P40L   | Hem | Mother | N/A | Seen in ExAc database                               | N/A                                                                                        | N/A      |

<sup>A</sup> 93 loss of function (mostly p.A52fs) are known in the internal exome database of Baylor College of Medicine without any overlapping clinical phenotype (no neutropenia), including this case and including one homozygous.

<sup>B</sup> 2 hemizygous loss of function (and 3 female het) are known in the internal exome database of Baylor College of Medicine without any overlapping clinical phenotype, including this case. 7 hemizygous LOF individuals reported in ExAC.

**Supplemental Table 3: Pathogenic CNVs encompassing *SRP54* as reported in public databases**

| Database              | Variant ID | Variant               | Type             | Size     | Clinical Assertion    | Phenotype(s)                                                                                                                                                                                                                     | References |
|-----------------------|------------|-----------------------|------------------|----------|-----------------------|----------------------------------------------------------------------------------------------------------------------------------------------------------------------------------------------------------------------------------|------------|
| Decipher <sup>A</sup> | 286741     | 14:29639741-35604711  | copy number loss | 5.96 Mb  | Definitely pathogenic | Agenesis of corpus callosum, Hypertonia, Intellectual disability, Postnatal microcephaly, Short stature                                                                                                                          | -          |
| Decipher              | 289774     | 14:35007710-44901392  | copy number loss | 9.89 Mb  | Definitely pathogenic | Anal stenosis, Congenital hypothyroidism, Dry skin, Frequent falls, Generalized muscle weakness, Global developmental delay, Intellectual disability, Retinal dystrophy                                                          | -          |
| Decipher              | 300434     | 14:33974276-37707521  | copy number loss | 3.73 Mb  | Definitely pathogenic | Global developmental delay                                                                                                                                                                                                       | -          |
| Decipher              | 337740     | 14:33086546-44485372  | copy number loss | 11.40 Mb | Definitely pathogenic | Macroglossia, Neonatal hypotonia                                                                                                                                                                                                 | -          |
| dbVar <sup>B</sup>    | nsv2778054 | 14:19794561-107234280 | copy number gain | 87.44 Mb | Pathogenic            | Developmental delay AND/OR other significant developmental or morphological phenotypes                                                                                                                                           | (1)        |
| dbVar                 | nsv2775779 | 14:34049147-49348823  | copy number loss | 15.3 Mb  | Pathogenic            | Global developmental delay                                                                                                                                                                                                       | (1)        |
| dbVar                 | nsv2772240 | 14:23164384-54733411  | copy number gain | 31.57 Mb | Pathogenic            | Delayed gross motor development; Intellectual disability                                                                                                                                                                         | (1)        |
| dbVar                 | nsv996197  | 14:20511672-49111245  | copy number gain | 28.6 Mb  | Pathogenic            | Abnormal facial shape; Failure to thrive; Flexion contracture; Global developmental delay; Hypothyroidism; Seizures; Short neck                                                                                                  | (1)        |
| dbVar                 | nsv996041  | 14:34349618-42828688  | copy number loss | 8.48 Mb  | Pathogenic            | Delayed gross motor development; Delayed speech and language development; Morphological abnormality of the central nervous system; Muscular hypotonia                                                                            | (1)        |
| dbVar                 | nsv995182  | 14:20511673-107285437 | copy number gain | 86.77 Mb | Pathogenic            | Abnormal facial shape; Abnormality of cranial sutures; Ectrodactyly; Hearing impairment; Jaundice; Retrognathia; Sandal gap; Short stature; Sparse hair; Thrombocytopenia; Ventricular septal defect                             | (1)        |
| dbVar                 | nsv931929  | 14:20490852-44562875  | copy number gain | 24.07 Mb | Pathogenic            | Cleft palate; Cleft upper lip; Delayed gross motor development; Intellectual disability; Intrauterine growth retardation; Talipes equinovarus; Transposition of the great arteries                                               | (1)        |
| dbVar                 | nsv917265  | 14:31261477-45154334  | copy number loss | 13.89 Mb | Pathogenic            | Abnormal facial shape; Abnormality of mouth size; Cupped ear; Epicanthus; Gastroesophageal reflux; Global developmental delay; Hearing impairment; Infantile axial hypotonia; Inguinal hernia; Limb dystonia; Prominent forehead | (1)        |
| dbVar                 | nsv532465  | 14:20619108-40215358  | copy number gain | 19.6 Mb  | Pathogenic            | Developmental delay AND/OR other significant developmental or morphological phenotypes                                                                                                                                           | (2)        |
| dbVar                 | nsv532462  | 14:20468770-39453619  | copy number gain | 18.98 Mb | Pathogenic            | Craniofacial Abnormalities; Hypertonia; Intellectual disability                                                                                                                                                                  | (2)        |
| dbVar                 | nsv531003  | 14:31139520-45459798  | copy number gain | 14.32 Mb | Pathogenic            | Coarse facial features                                                                                                                                                                                                           | (2)        |
| dbVar                 | nsv530375  | 14:20619308-          | copy             | 86.64    | Pathogenic            | Global developmental delay                                                                                                                                                                                                       | (1)        |

|       |           |                      |                  |          |            |                                                                                        |     |
|-------|-----------|----------------------|------------------|----------|------------|----------------------------------------------------------------------------------------|-----|
|       |           | 107263478            | number gain      | Mb       |            |                                                                                        |     |
| dbVar | nsv530014 | 14:34920140-37349356 | copy number loss | 2.43 Mb  | Pathogenic | Developmental delay AND/OR other significant developmental or morphological phenotypes | (2) |
| dbVar | nsv530012 | 14:24018169-42452605 | copy number loss | 18.43 Mb | Pathogenic | Developmental delay AND/OR other significant developmental or morphological phenotypes | (2) |
| dbVar | nsv530007 | 14:20665104-45754005 | copy number loss | 25.09 Mb | Pathogenic | Global developmental delay                                                             | (2) |
| dbVar | nsv498512 | 14:30851760-38181546 | copy number loss | 7.33 Mb  | Pathogenic | Developmental delay AND/OR other significant developmental or morphological phenotypes | (1) |

<sup>A</sup> DatabasE of Chromosomal Imbalance and Phenotype in Humans using Ensembl Resources , DECIPHER; <https://decipher.sanger.ac.uk/application>

<sup>B</sup> Database of Structural Variation, dbVAR; <http://www.ncbi.nlm.nih.gov/dbvar>

## References

1. Miller DT, Adam MP, Aradhya S, Biesecker LG, Brothman AR, Carter NP, et al. Consensus statement: chromosomal microarray is a first-tier clinical diagnostic test for individuals with developmental disabilities or congenital anomalies. *American journal of human genetics*. 2010;86(5):749-64.
2. Kaminsky EB, Kaul V, Paschall J, Church DM, Bunke B, Kunig D, et al. An evidence-based approach to establish the functional and clinical significance of copy number variants in intellectual and developmental disabilities. *Genetics in medicine : official journal of the American College of Medical Genetics*. 2011;13(9):777-84.

**Supplemental Table 4. Possibly pathogenic variants of *SRP54* reported in ExAc**

| Chrom. | Position | Variant | Frequency   | Allele count | Number of hom. | GERP++_NR | LRT      | Mutation Assessor | Mutation Taster | PhyloP | Polyphen2_HDIV | rsID        | Effect   |
|--------|----------|---------|-------------|--------------|----------------|-----------|----------|-------------------|-----------------|--------|----------------|-------------|----------|
| 14     | 35465929 | A>G     | 0.000008242 | 1            | 0              | 6.04      | 0        | 2.995             | 1               | 1.178  | 0.983          | rs777914961 | missense |
| 14     | 35465938 | G>T     | 0.000008242 | 1            | 0              | 6.04      | 0        | 3.465             | 1               | 1.03   | 1              | rs771241246 | missense |
| 14     | 35465939 | A>T     | 0.000008242 | 1            | 0              | 6.04      | 0        | 1.675             | 1               | 1.178  | 1              | rs774740121 | missense |
| 14     | 35465962 | C>T     | 0.00002473  | 3            | 0              | 6.17      | 0        | 3.135             | 1               | 0.92   | 0.996          | rs775147862 | missense |
| 14     | 35468768 | T>C     | 0.000008316 | 1            | 0              | 5.64      | 1.00E-06 | 3.585             | 1               | 0.964  | 1              | rs766140384 | missense |
| 14     | 35477846 | A>T     | 0.0001027   | 12           | 0              | 5.03      | 1.00E-06 | 1.16              | 0.999999        | 1.135  | 1              | rs191230389 | missense |
| 14     | 35477881 | G>T     | 0.000008406 | 1            | 0              | 5.03      | 0        | 2.865             | 1               | 0.993  | 1              | rs761089126 | missense |
| 14     | 35477980 | G>C     | 0.000008288 | 1            | 0              | 5.03      | 0        | 1.05              | 1               | 0.993  | 1              | rs775741587 | missense |
| 14     | 35478009 | A>T     | 0.000008314 | 1            | 0              | 5.03      | 0        | 1.5               | 1               | 1.135  | [0.999, 0.992] | rs764460322 | missense |
| 14     | 35480822 | A>G     | 0.000008255 | 1            | 0              | 5.81      | 0        | 3.92              | 1               | 1.14   | 1              | rs766018104 | missense |
| 14     | 35480840 | A>T     | 0.000008264 | 1            | 0              | 5.81      | 0        | 5.2               | 1               | 1.14   | 1              | rs369651041 | missense |
| 14     | 35482589 | T>C     | 0.00001648  | 2            | 0              | 5.5       | 0        | 1                 | 1               | 1.061  | [0.999, 0.998] | rs757036271 | missense |
| 14     | 35482693 | C>G     | 0.000008242 | 1            | 0              | 5.65      | 0        | 2.315             | 0.999999        | 0.935  | [0.986, 0.95]  | rs750331626 | missense |
| 14     | 35483018 | A>G     | 0.000008255 | 1            | 0              | 5.76      | 0        | 3.475             | 1               | 1.199  | [0.928, 0.873] | rs778122134 | missense |
| 14     | 35483028 | C>T     | 0.00001649  | 2            | 0              | 5.76      | 0        | 5.2               | 1               | 0.935  | 0.999          | rs749487051 | missense |
| 14     | 35483058 | T>C     | 0.00000824  | 1            | 0              | 5.76      | 0        | 2.29              | 1               | 1.061  | [0.938, 0.891] | rs776316751 | missense |
| 14     | 35487898 | G>A     | 0.000008274 | 1            | 0              | 5.77      | 0        | 2.98              | 1               | 0.998  | 1              | rs755358034 | missense |
| 14     | 35492205 | G>T     | 0.00000824  | 1            | 0              | 5.54      | 0        | 3.09              | 1               | 1.048  | [0.967, 0.942] | rs770936481 | missense |
| 14     | 35492208 | G>A     | 0.00000824  | 1            | 0              | 5.54      | 0        | 2.78              | 1               | 1.048  | 0.751          | rs374841884 | missense |



**Supplemental Table 5. Primers used for PCR amplifications and Sanger sequencing of SRP54**

| Exons       | Identity         | Sequence (5' -> 3')                      |
|-------------|------------------|------------------------------------------|
| Exon 1      | SRP54-ex1-F      | ACAGGTTGAGGCTATGGAAGGTG                  |
|             | SRP54-ex1-R      | AGCCATCTTCCCAATGCTAGTGAC                 |
| Exon 2      | SRP54-ex2-F      | ACCATGCCGGGCCTATAATTACTT                 |
|             | SRP54-ex2-R      | CACTTCCAGTTAGCACCTCTTTCCA                |
| Exon 3      | SRP54-ex3-F2     | GTCTGTAGTAATTACATGCATGTTAATTGGAAGAC      |
|             | SRP54-ex3-R2     | CCACTGAGTATAGAATCACAGCATAATCTTC          |
| Exon 4      | SRP54-ex4-F4     | GGGTTTTGAATTTATATGTATGTTAACCTGATT        |
|             | SRP54-ex4-R4     | ACAAAACCTTGATTTATACAAACCTATCTTCCAT       |
| Exons 5,6   | SRP54-exs5-6-F   | GAATGCTACTGCATGACAATTAGAATATAAACTTTGTAGG |
|             | SRP54-exs5-6-R   | GCTGACAGACAAGAAGAGGGATATAAGTG            |
| Exon 7      | SRP54-ex7-F      | TTGAAATTGGGGTCATTTTGGCTTT                |
|             | SRP54-ex7-R      | ATTACTGGGGATCTGCCTCACA                   |
| Exon 8      | SRP54-ex8-F      | GCCACTGCACCTGGCTCTAAATA                  |
|             | SRP54-ex8-R      | TCCCAAGACAGAGGACAACAGTATC                |
| Exon 9      | SRP54-ex9-F      | TAGCTTTGGAGGCGGATTCACT                   |
|             | SRP54-ex9-R      | ACCACAGAGGGCAGATAACCATT                  |
| Exon 10     | SRP54-ex10-F     | CCTGGCCATGCCACTTAACTTT                   |
|             | SRP54-ex10-R     | CTGTAAGTCTCAGGTACCTGAGA                  |
| Exons 11,12 | SRP54-ex11-12-F2 | GATAGGACCTGTCTTTGTCTATGTATTCTCCC         |
|             | SRP54-ex11-12-F2 | GCCTGAGGAAAATAATCTGCCATCTTAC             |
| Exon 13     | SRP54-ex13-F     | TTGCACATAACTGCTTTGATGGTGA                |
|             | SRP54-ex13-R     | TTTTCCAATACTGGCAGCACTCTTT                |
| Exon 14*    | SRP54-ex14-F     | CCTCCTACGCTGACTCAAATCTTT                 |
|             | SRP54-ex14-R     | AAACTGCATTAGCAACTGCCAAC                  |
| Exon 15     | SRP54-ex15-F     | TCGCAATAACTCCGTAAGATAGGCT                |
|             | SRP54-ex15-R     | GAAACGCTGAGGTCTCAGCAA                    |

\* Sequencing primers were the same as amplification primers, except for exon 14 where the sequencing primers were the following : forward (SRP54-ex14A-F): TGAATCAAATCTTTTTTTTTTTTCCCTCAG and reverse (SRP54-ex14A-R): GCAACTGCCAACAACCTGGTATTTAC.

NB.: The following primers were used to confirm the variant in patient CII.1: GCCTGGGTGACAAGAGTGTG and CAAACCTATCTTCCATATGACTTCTTTTT.

## **SUPPLEMENTAL METHODS**

### **MITOCHONDRIAL DNA ANALYSIS**

The whole mitochondrial genome was amplified in two overlapping fragments of 8009 bp (amplicon A) and 8994 bp (amplicon B). The primer pairs used for both PCRs - tested on DNA extracted from cells devoid of mtDNA-(Rho Zero cells) to avoid pseudogene amplification - were located on the cytochrome B and cytochrome c oxidase 1 genes: 5'-TACGTTGTAGCCCACTTCCACT-3' and 5'-GCCCCGATGTGTAGGAAGAG-3' for amplicon A; 5'-AACTTCGGCTCACTCCTTGG-3' and 5'-AGTAACGTCGGGGCATTCCG-3' for amplicon B. Long-range PCR was performed with KapaLongRange DNA polymerase according to the manufacturer's recommendations (Kapa Biosystems, Boston, MA). The concentrations of PCR products were quantified by the Qubit® 2.0 Fluorometer using the Qubit® dsDNA HS Assay Kit (Thermo Fischer technologies, Waltham, MA). For each sample, amplicons A and B were pooled in an equimolar manner. Libraries were compiled from 50-200 ng of pooled PCR products with the enzymatic fragmentation method of the Library Builder Automate using the dedicated Ion Xpress™ Plus Fragment Library Kit (Thermo Fischer technologies). The enriched mtDNA samples were sequenced using an Ion Proton high-throughput sequencing platform according to the manufacturer's protocols (Thermo Fischer technologies). Sequencing reads were mapped to an mtDNA reference sequence (NC\_012920) before being analysed with Mitomaster software (<http://www.mitomap.org/MITOMAP>) and a dedicated in-house pipeline integrating various modules for coverage analysis, variant calling, annotation and prioritization.

### **KNOCK-DOWN OF *SRP54* BY SHRNA IN CELL LINES.**

HL60 is a human cell line derived from a patient with acute promyelocytic leukemia (ATCC® CCL-240™). Cells were grown in suspension in RPMI 1640 medium (ThermoFisher Scientific, Waltham, MA) supplemented with GlutaMAX™, 1% penicillin/streptomycin, 1 mM Sodium Pyruvate, and 10% heat-inactivated fetal bovine serum. HeLa (ATCC® CCL-2™) is a human

cell line derived from cervix adenocarcinoma. HeLa cells were grown in DMEM medium (ThermoFisher Scientific, Waltham, MA) supplemented with GlutaMAX™, 1% penicillin/streptomycin, and 10% heat-inactivated fetal bovine serum. All cultures were maintained at 37°C in a 5% CO<sub>2</sub>-humidified atmosphere. HeLa and HL60 cells were transfected using Lipofectamine™ 3000 Reagent (ThermoFisher Scientific, Waltham, MA). Twenty four hours prior to transfection, the cells were seeded in a 6-well plate at a cell density of 0.25 x 10<sup>6</sup> cells per well. First 3.75 µl of Lipofectamine™ 3000 were added to 125 µl of Opti-MEM™ medium, followed by addition of a mix containing 5 µg shRNA in 125 µl of Opti-MEM™ medium. The mixture was incubated at room temperature for 10 min and then added to the cells. In each case, the entire solution was added to the cells and mixed by gently swirling the plate. The plate was incubated at 37°C for 72 h in a 5% CO<sub>2</sub> incubator. The sequence of shRNA directed against *SRP54* was GAGGAAAGGUUGGAAGACCUGUUUA (Thermo Fisher Scientific). The control used was the Stealth RNAi Negative Control Duplex medium GC (45-55%) (Reference 10143902, ThermoFisher Scientific, Waltham, MA). Cells from each well were collected, and after centrifugation, washed once in D-PBS. The final pellet was suspended in 60 µl of lysis buffer (150mM NaCl, 1% NP40, 50mM Tris pH 8) including protease inhibitors (cOmplete, Roche Diagnostics GmbH) and left on ice for 20 min. The total cellular extract was centrifuged 30 min at 13000 rpm to remove cell debris. A Bradford assay was performed for quantifying proteins (BIO-RAD laboratories, Hercules, CA).

For Western blotting, 20 µg of cellular total extracts were loaded on 8% polyacrylamide gels (for mTOR and phospho-mTor), 12% acrylamide gels (for SRP54 and GAPDH) and 10% acrylamide gels (for DNAJC21 and SBDS). After migration at 150V, proteins were transferred onto PVDF membrane via semi-dry transfer (Trans-Blot, BIO-RAD laboratories, Hercules, CA). Membranes were blocked for 1h in 5% skimmed milk, TBS 0.1% Tween®20 (for mTOR and phospho-mTor) and 5% skimmed milk, PBS 0.05% Tween®20 (for SRP54, GAPDH, DNAJC21 and SBDS). Anti-mTOR (7C10, Cell Signaling, Danvers, MA) and anti-phospho mTOR Ser2448 (D9C2, Cell Signaling, Danvers, MA) antibodies were incubated overnight at

4°C in 5%BSA-TBS 0.1% Tween<sup>®</sup>20 at 1/1000 dilution. Anti-DNAJC21 (Proteintech, Rosemont, IL), anti-SBDS (ab 128946; Abcam, Cambridge, UK), anti-SRP54 (SC393855; Santa Cruz Biotechnology, Dallas, TX) were incubated overnight at 4°C in 5% skimmed milk PBS 0.05% Tween<sup>®</sup>20 at the following dilution : 1/1000 for DNAJC21, 1/10 000 for SBDS and 1/1000 for SRP54. Membranes were then incubated with secondary antibodies coupled to Horseradish peroxidase (HRP) (BIO-RAD laboratories, Hercules, CA). Antibodies were revealed with an enhanced chemiluminescence detection system using ChemiDoc XRS (BIO-RAD laboratories, Hercules, CA). Loading control was performed with an anti-GAPDH antibody (MAB374, Merck-Millipore, Molsheim, France).

#### **SUPPLEMENTAL FIGURES LEGENDS**

**Embedded within figures**

## Supplemental Figure 1

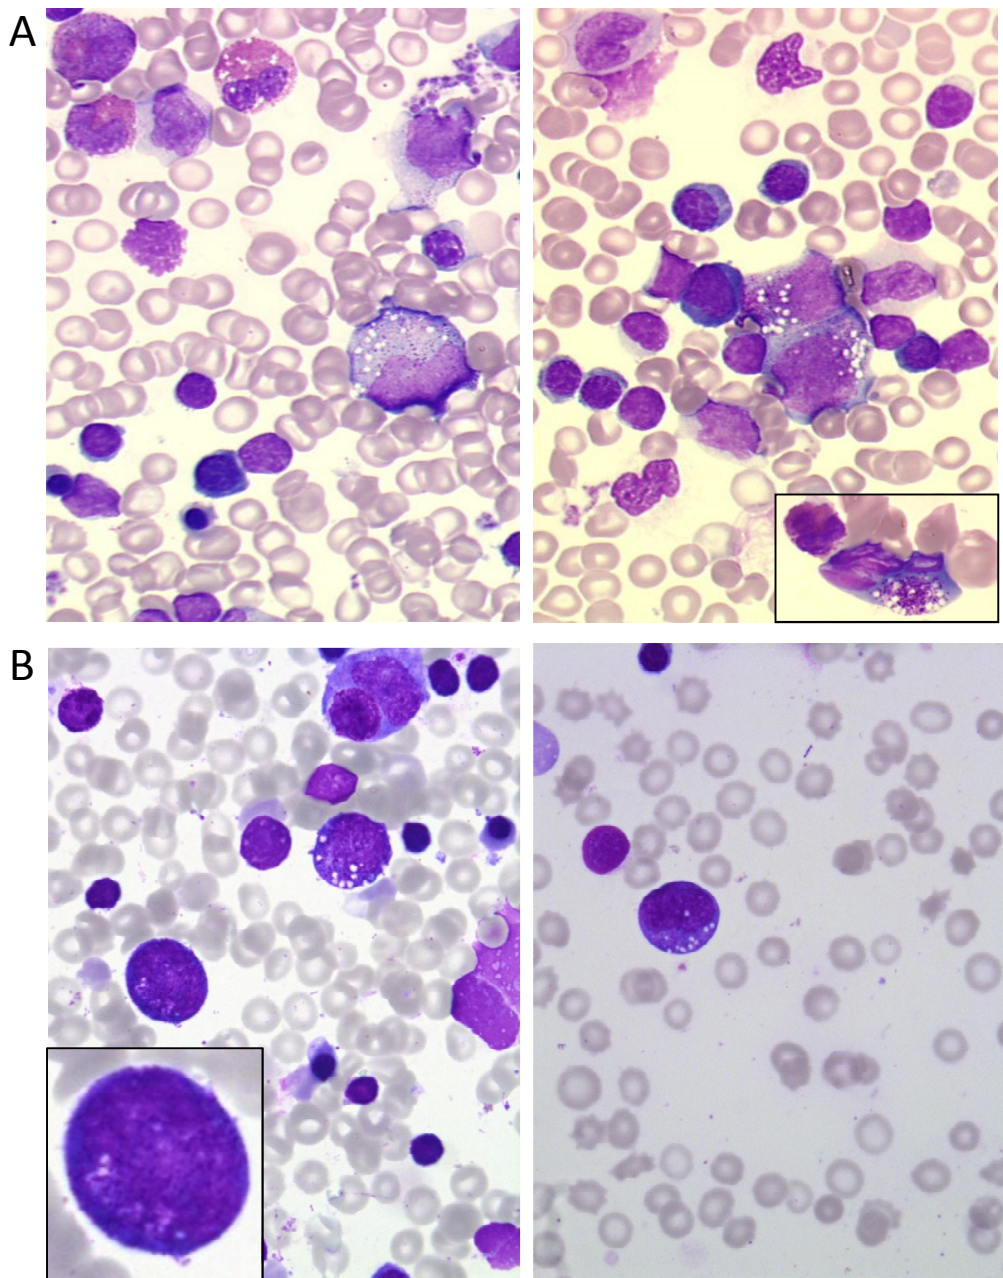

### Supplemental Figure 1. Bone marrow smears of patients All.1 and Bll.1 at diagnosis.

(A) Bone marrow smear of patient All.1 was hypocellular with regards to age and disclosed a hypoplastic neutrophil lineage (5%) with retarded granulocytic maturation. By contrast, hypereosinophilia was observed at 8.5% as well as 13% monocytes. There were 39.5% lymphocytes and a subset of 10% hematogones. Myeloblasts and promyelocytes displayed numerous cytoplasmic vacuoles suggesting the onset of apoptosis, confirmed by a few images of apoptotic cells (right panel, lower right box). (B) Bone marrow smear of patient Bll.1 showed a typical maturation arrest at the promyelocyte stage with presence of vacuolated promyelocytes. Other cell lineages were normal.

## Supplemental Figure 2

# A

|               | Gene Locus | Sequence variation | Mutation type           | Phylogenetic conservation (%) | Status | Patient haplogroup |
|---------------|------------|--------------------|-------------------------|-------------------------------|--------|--------------------|
| Patient AII.1 | D-Loop     | m.513 G>GCACA      | non-coding              | -                             | Poly   | K1d1               |
|               | D-Loop     | m.567 A>ACCC       | non-coding              | -                             | Poly   |                    |
|               | MTCO3      | m.9287 G>A         | synonymous              | -                             | Poly   |                    |
|               | MTCO3      | m.9591 G>A         | non-syn:<br>p.Val129Ile | 97                            | Poly   |                    |
|               | MTND4      | m.10907 T>C        | non-syn:<br>p.Phe50Leu  | 13                            | Poly   |                    |
|               | MTND5      | m.12501 G>A        | synonymous              | -                             | Poly   |                    |
|               | D-Loop     | m.16184 C>T        | non-coding              | -                             | Poly   |                    |
|               | D-Loop     | m.16223 CT>C       | non-coding              | -                             | Poly   |                    |
|               | D-Loop     | m.16361 GT>G       | non-coding              | -                             | Poly   |                    |
| Patient BII.1 |            |                    |                         |                               |        |                    |
|               | MTCOX1     | m.6719 T>C         | synonymous              | -                             | Poly   | H1b                |
|               | MTND5      | m.12618 G>A        | synonymous              | -                             | Poly   |                    |
|               | MTND5      | m.13419A>G         | synonymous              | -                             | Poly   |                    |
|               | D-Loop     | m.16265 A>G        | non-coding              | -                             | Poly   |                    |
|               | D-Loop     | m.16390 G>A        | non-coding              | -                             | Poly   |                    |

# B

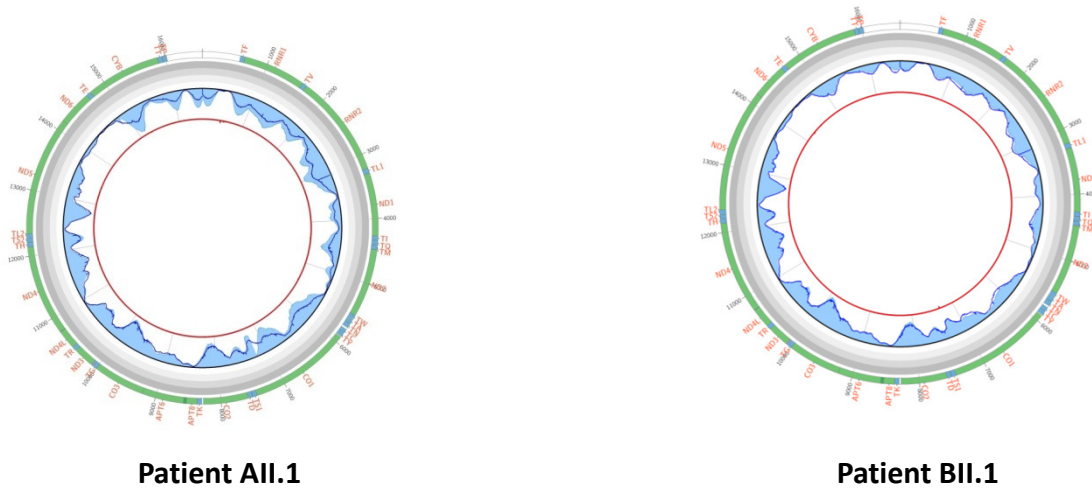

### Supplemental Figure 2. Mitochondrial genome analysis.

**(A) Mitochondrial DNA variants identified by Next-Generation Sequencing (NGS).** The analysis did not reveal any pathogenic mutations or rearrangements of the entire mitochondrial DNA. **(B) Circos graphical representation of the circular whole mitochondrial genome.** The analysis of the mtDNA shows the absence of mtDNA rearrangements. In addition, long range PCR products loaded on an agarose gel did not reveal any mtDNA rearrangements (not shown).

## Supplemental Figure 3

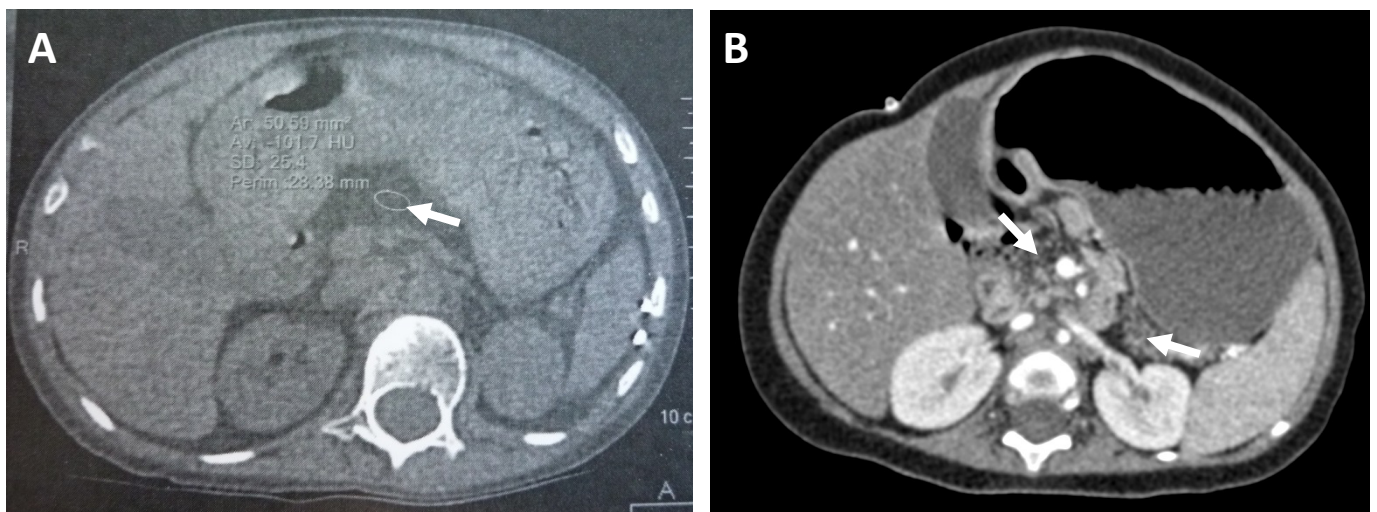

### Supplemental Figure 3. Fatty infiltration of the pancreas in patients AII.1 and BII.1.

Panels A and B represent CT scans showing a fatty infiltration of the pancreas (white arrow) in case of patients AII.1 and BII.1, respectively.

**Supplemental Figure 4**

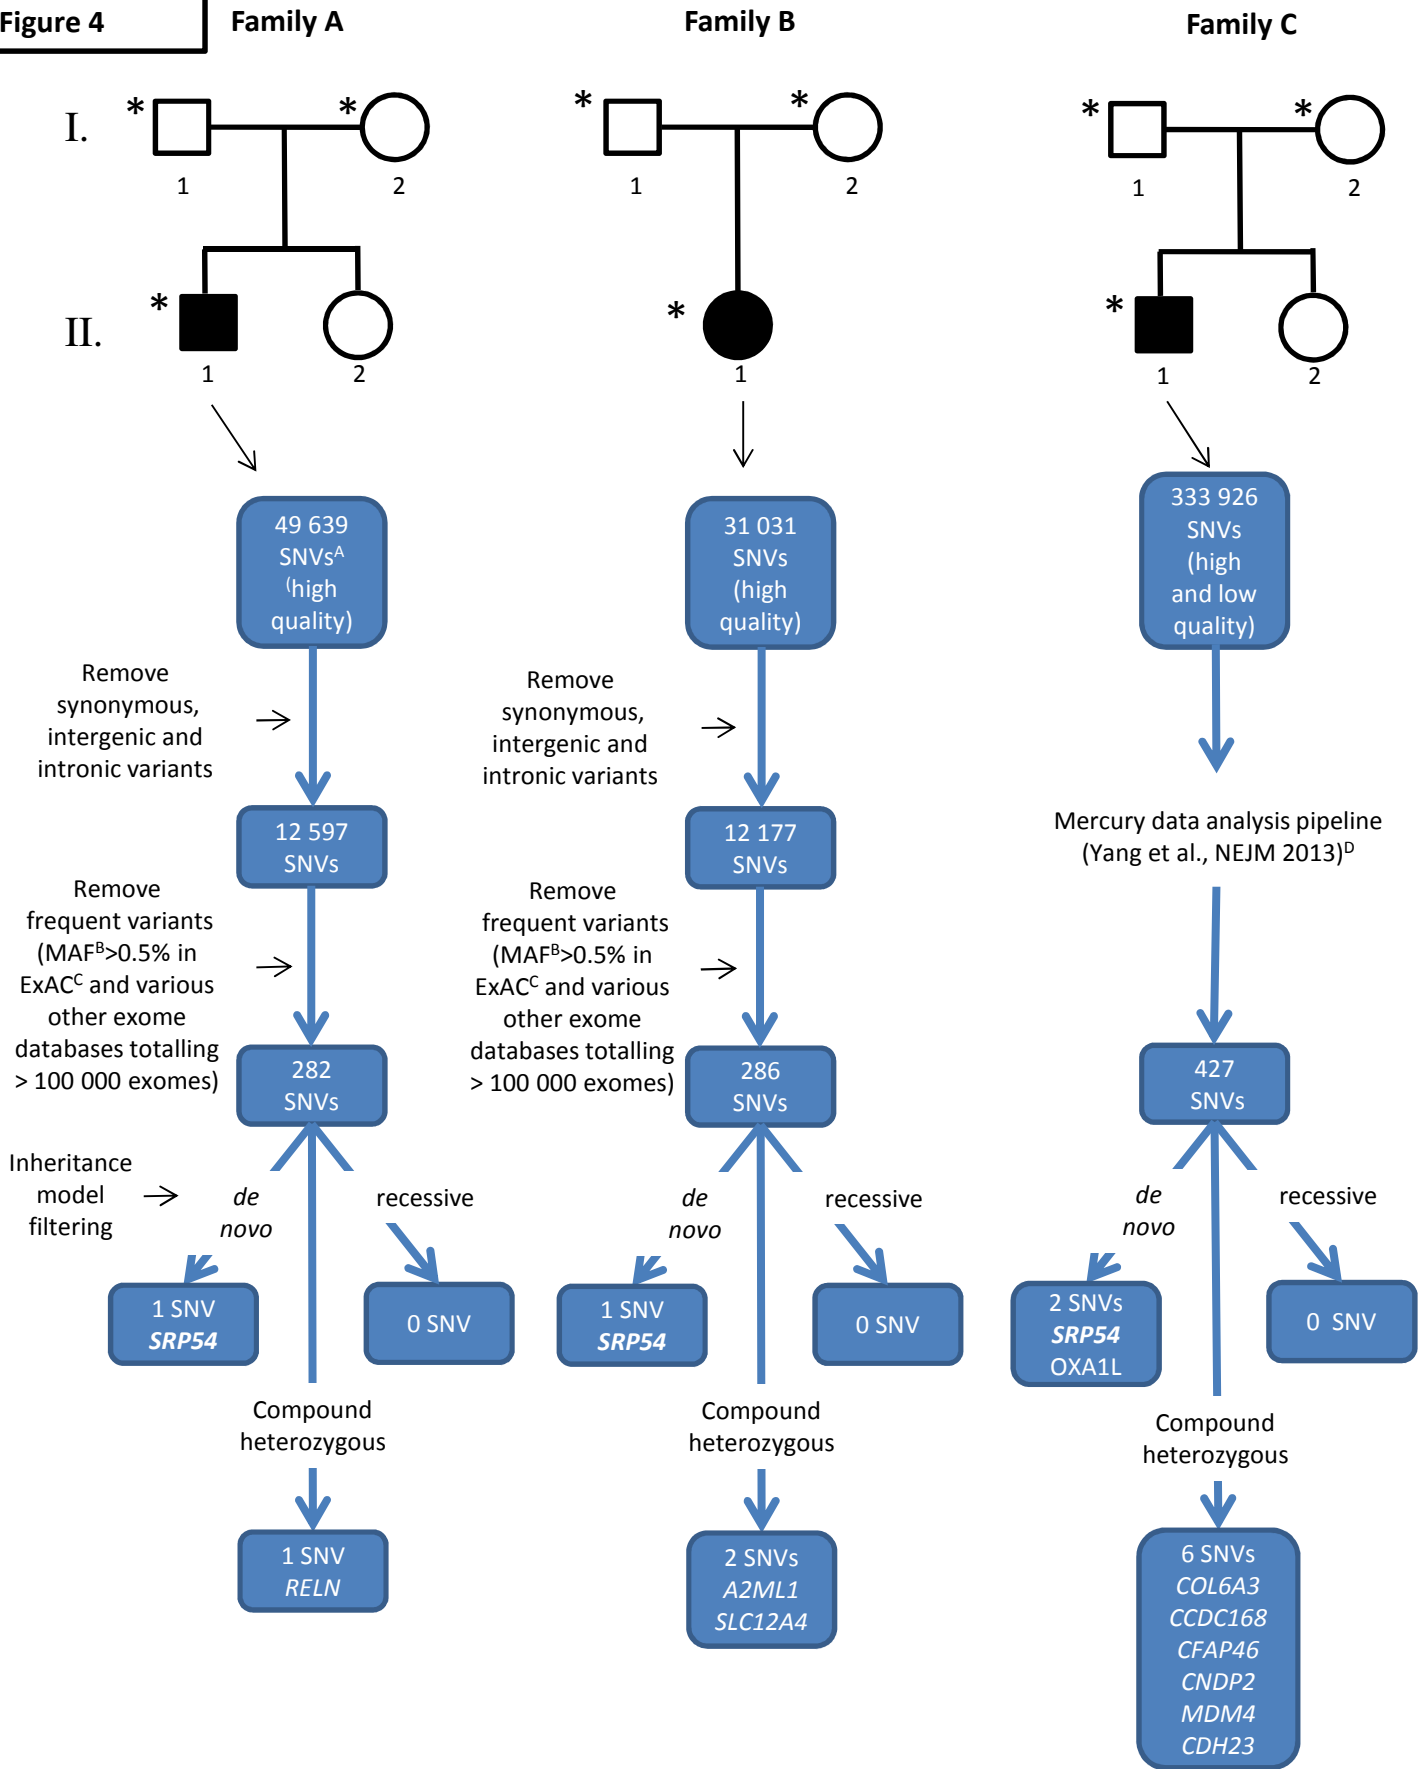



**Supplemental Figure 4. Variant filtering strategy in trio whole exome sequencing in families A, B and C.**

In pedigrees, black icons denote affected individuals. Asterisks indicate subjects who underwent exome sequencing. <sup>A</sup> SNV: single nucleotide variant. <sup>B</sup> Minor Allele Frequency. <sup>C</sup> The Exome Aggregation Consortium, ExAC; <http://exac.broadinstitute.org>. <sup>D</sup> Reference: Yang Y, Muzny DM, Reid JG, Bainbridge MN, Willis A, Ward PA, et al. Clinical whole-exome sequencing for the diagnosis of mendelian disorders. The New England Journal of Medicine. 2013;369(16):1502-11.

## Supplemental Figure 5

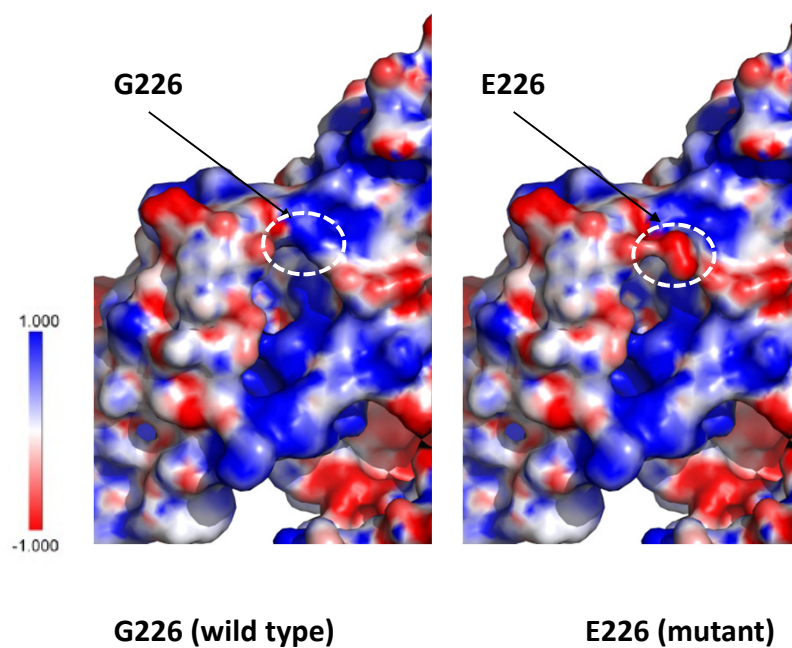

### Supplemental Figure 5. Structural impacts of the SRP54 mutation p.G226E.

Electrostatic potential surface of SRP54 (based on PDB 2j37 chain W), centered on residue 226. The negative (red) and the positive charges (blue) are shown.

## Supplemental Figure 6

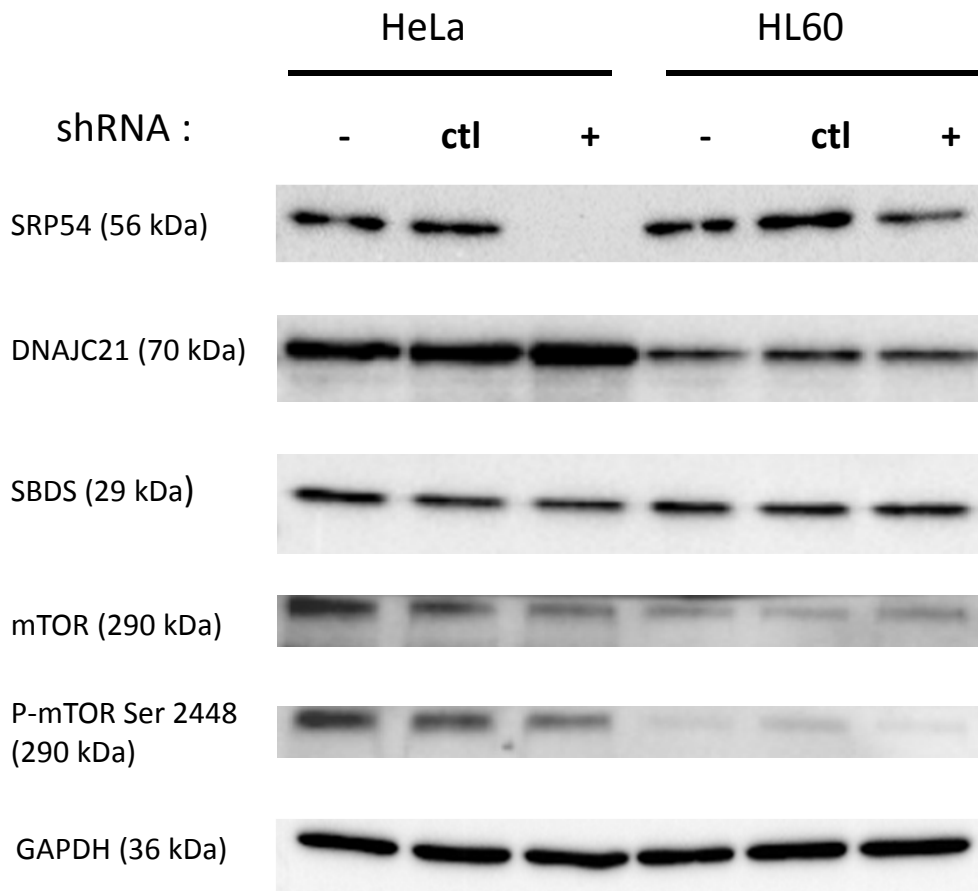

### Supplemental Figure 6. Knockdown of *SRP54* by shRNA in two cell lines.

-: non-transfected control; ctl: negative shRNA control, +: shRNA targeting *SRP54*. In HL60, the silencing of *SRP54* was estimated at 72% as compared to the control shRNA using the Image Lab software (BioRad laboratories, Hercules, CA). *SRP54* and *GAPDH* analyses were performed on the same gel/membrane. *DNAJC21*, *SBDS*, *mTOR* and *P-mTOR* analyses were done on different gels/membranes, but using identical quantities of material originating from the same original protein extract.

## Supplemental Figure 7

### A *srp54*

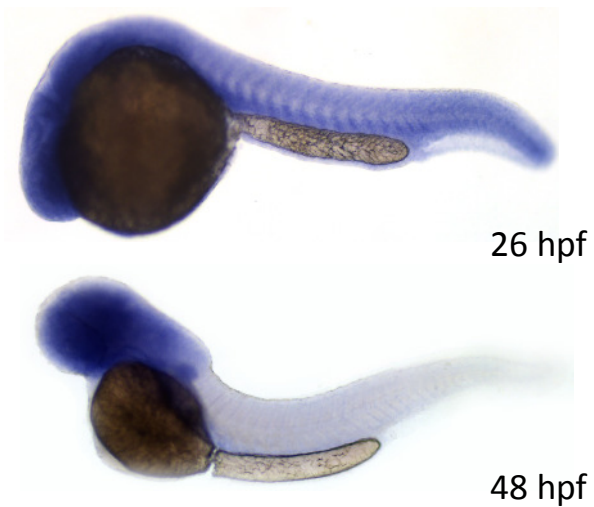

### B splice modification

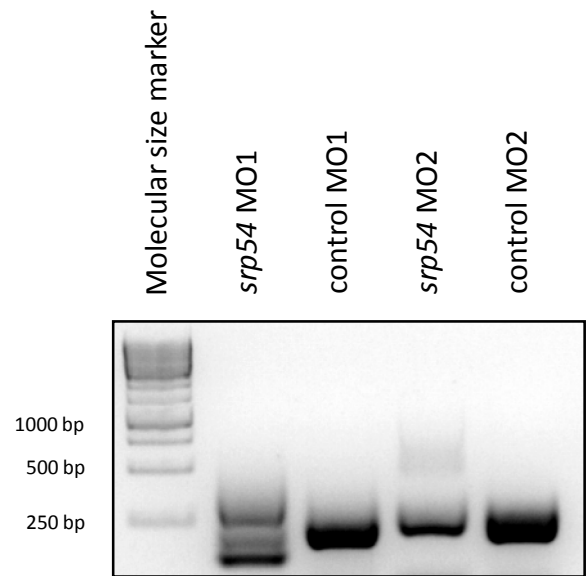

### Supplemental Figure 7. Confirmation of *srp54* expression and splice modification after *srp54* MO injection.

(A) WISH of *srp54* showing ubiquitous expression at 26 hpf (upper panel) and decrease over time (48 hpf, lower panel). (B) RT-PCR of *srp54* in embryos injected with *srp54* MO1 or MO2 indicate splice modification.

## Supplemental Figure 8

|         |     |                                                                 |     |
|---------|-----|-----------------------------------------------------------------|-----|
| hSRP54  | 1   | MVLADLGRKITSALRSLSNATIINEEVLNAMLKEVCTALLEADVNIKLVK              | 50  |
|         |     |                                                                 |     |
| zfsRP54 | 1   | MVLADLGRKITSALRSLSNATIINEEVLNAMLKEVCAALLEADVNIKLVK              | 50  |
| hSRP54  | 51  | QLRENVKSAIDLEEMASGLNKRKMIQHAVFKELVKLVDPGVKAWTPTKGK              | 100 |
|         |     | :     :                                                         |     |
| zfsRP54 | 51  | QLRENVKAAIDLEEMASGLNKRKMIQHAVFKELVKLVDPGVKAWTPTKGK              | 100 |
|         |     | :     :                                                         |     |
| hSRP54  | 101 | QNVIMFVGLQGS <del>TTT</del> TC SKLAYYYQRKGWKTCLICADTFRAGAFDQLKQ | 150 |
|         |     | .     :     :                                                   |     |
| zfsRP54 | 101 | NNVIMFVGLQGS <del>TTT</del> TC SKLAYYFQRKGWKTCLICADTFRAGAFDQLKQ | 150 |
|         |     | :     :                                                         |     |
| hSRP54  | 151 | NATKARIPFYGSYTEM DPVI IASEGVEKFKNENFEIIIIVDTSGRHKQEDS           | 200 |
|         |     | :     :                                                         |     |
| zfsRP54 | 151 | NATKARIPFYGSYTEM DPVI IAAEGVEKFKSENFEIIIIVDTSGRHKQEDS           | 200 |
|         |     | :     :                                                         |     |
| hSRP54  | 201 | LFEEMLQVANAIQPDNIVYVMDASIGQACEAQAKAFKDKVDVASVIVTKL              | 250 |
|         |     | :     :                                                         |     |
| zfsRP54 | 201 | LFEEMLQVSNVQPDNIVYVMDASIGQACEAQAKAFKDKVDVASVIVTKL               | 250 |
|         |     | :     :                                                         |     |
| hSRP54  | 251 | DGHAKGGGALSAVAATKSPIIFIGTGEHIDDFEPFKTQPFISKLLGMGDI              | 300 |
|         |     | :     :                                                         |     |
| zfsRP54 | 251 | DGHAKGGGALSAVAATKSPIIFIGTGEHIDDFEPFKTQPFISKLLGMGDI              | 300 |
|         |     | :     :                                                         |     |
| hSRP54  | 301 | EGLIDKVNELKLDDNEALIEKCLKHGQFTLRDMYEQFQNIKMGPFQILG               | 350 |
|         |     | :     :                                                         |     |
| zfsRP54 | 301 | EGLIDKVNELKLDDNEELIDKCLKHGQFTLRDMYEQFQNIKMGPFQIMG               | 350 |
|         |     | :     :                                                         |     |
| hSRP54  | 351 | MIPGFGTD FMSKGNQESMARLKKLMTIMDSMNDQELDSTDGAKVFSKQP              | 400 |
|         |     | :     :                                                         |     |
| zfsRP54 | 351 | MIPGFGTD FMSKGNQESMARLKKLMTIMDSMNDQELDNKDGAKLFSKQP              | 400 |
|         |     | :     :                                                         |     |
| hSRP54  | 401 | GRIQRVARGSGVSTRDVQELLTQYTKFAQMVKMGGIKGLFKGGDMSKNV               | 450 |
|         |     | .     :     :                                                   |     |
| zfsRP54 | 401 | NRIQRVARGSGVATRVDVQELLTQYTKFAQMVKMGGIKGLFKGGDMSKNV              | 450 |
|         |     | :     :                                                         |     |
| hSRP54  | 451 | SQSQMAKLNQQMAKMMDPVRLHHMGGMAGLQSMRQFQQGAAGNMKGMMG               | 500 |
|         |     | :.     :     :                                                  |     |
| zfsRP54 | 451 | NPSQMAKLNQQMAKMMDPVRLHHMGGMAGLQSMRQFQQGAAGNMKGMMG               | 500 |
|         |     | :     :                                                         |     |
| hSRP54  | 501 | FNNM 504                                                        |     |
|         |     |                                                                 |     |
| zfsRP54 | 501 | FNNM 504                                                        |     |

**Supplemental Figure 8. Alignment of human and zebrafish SRP54 proteins.**  
 The localization of the three mutations presented in this work are highlighted in blue.

**A** *mpx*, 48 hpf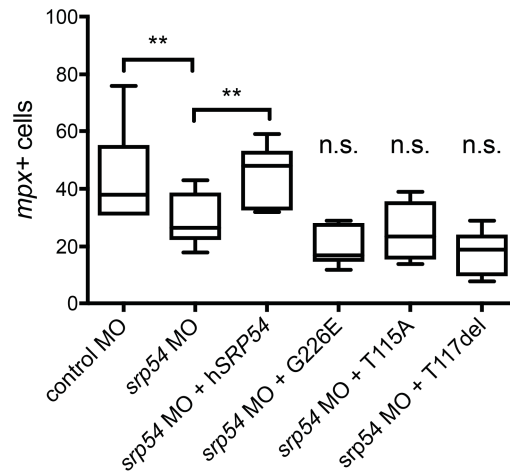**B** *Tg(lyz:DsRed)*, 48 hpf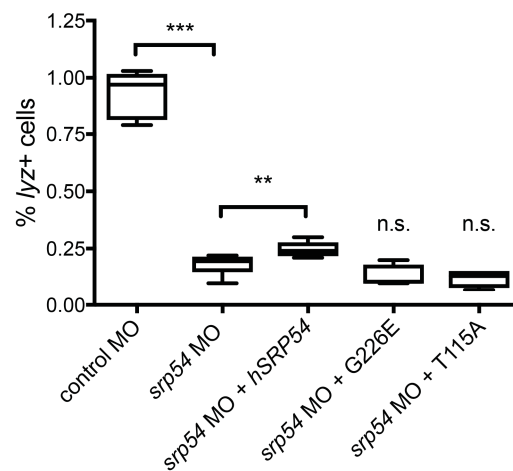

**Supplemental Figure 9. Co-injection of mutated versions of *hSRP54* mRNA fails to rescue neutropenia in morphants.**

(A) Semi-automated quantification of *mpx*+ cells after WISH from control, *srp54* MO injected, MO + *hSRP54* mRNA, MO + G226E mRNA, MO + T115A mRNA and MO + T117del co-injected transgenic embryos. For each group, five or more embryos were analyzed. In (B), percentages of positive fluorescence from dissociated *lyz*+ cells are shown. A 1-way ANOVA with multiple comparisons was used to test for statistical significance and error bars are shown as  $\pm$  standard deviation ( $p < 0.001$  \*\*\*,  $p < 0.01$  \*\*,  $p < 0.05$  \*). Four biological replicates with at least 5 embryos per experiment were performed.

# Supplemental Figure 10

## A *mpx*, 48 hpf

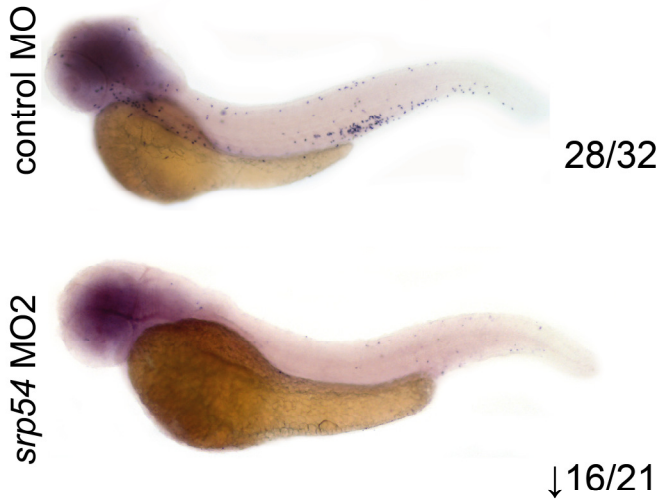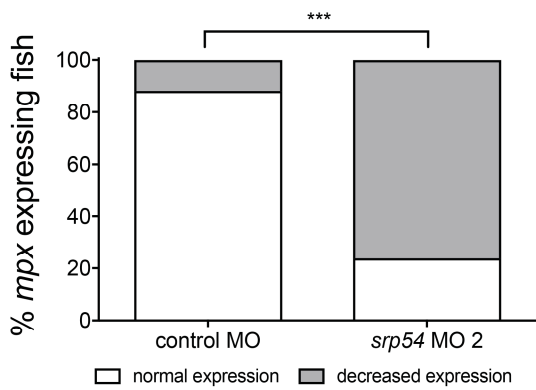

## B *trypsin*, 72 hpf

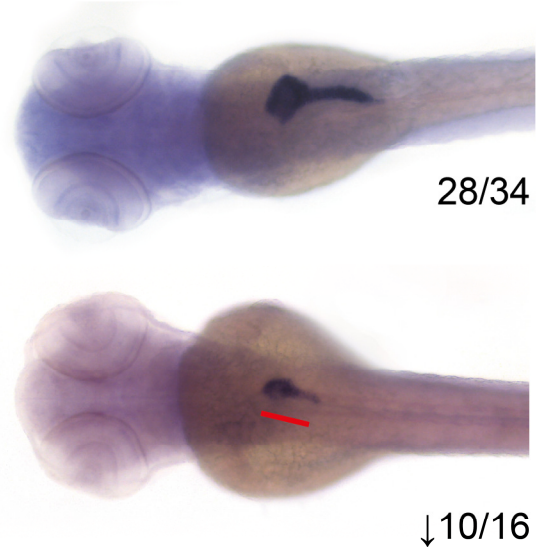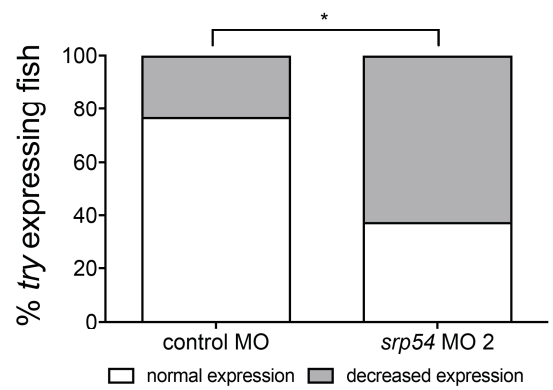

## C *Tg(mpx:eGFP)*, 48 hpf

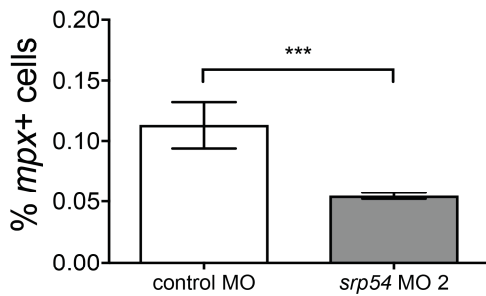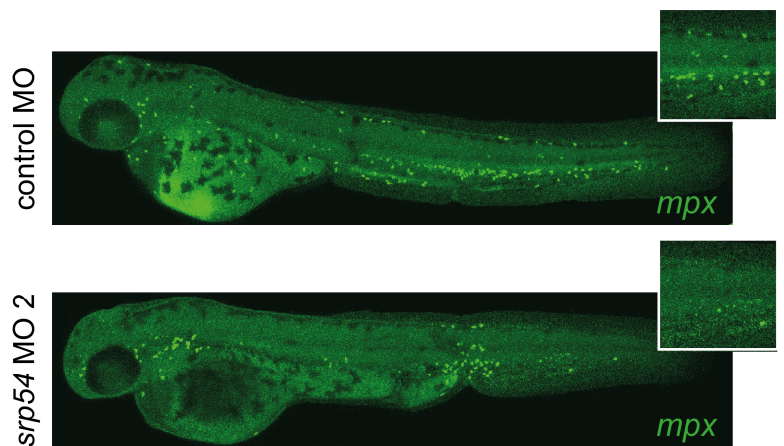

**Supplemental Figure 10. Effects of *srp54* gene knockdown in zebrafish embryos by using an alternative morpholino oligonucleotide (MO2).**

**(A)** WISH of *mpx* at 48 hpf in control injected (upper) and *srp54* morpholino 2 (MO2) injected (lower) zebrafish embryos. **(B)** WISH of *trypsin* at 72 hpf in control injected (upper) and MO2 injected (lower) zebrafish embryos. A Fisher's exact test was performed to test for statistical significance. **(C)** Flow cytometry quantification of dissociated Tg(*mpx:eGFP*) embryos at 48 hpf confirming results from (A). Percentages of positive fluorescence in both dissociated control and *srp54* MO injected transgenic embryos are shown. On the right, representative pictures of control and *srp54* MO injected Tg(*mpx:eGFP*) embryos are depicted.

In A & C, lateral views are shown, with anterior to the left, dorsal up. In B, dorsal views are shown with anterior to the left. Numbers indicate the amount of embryos presenting with the phenotype shown in the picture/total number of embryos analyzed in each experiment. The arrow (↓) indicates the diminution of expression in knockdown versus wild type embryos. **A minimum of three biological replicates was performed for each marker with at least n=5 embryos per experiment for each condition.** A Mann-Whitney U-test was used to test for statistical significance and error bars are shown as ± standard deviation. (p < 0.001 \*\*\*, p < 0.01 \*\*, p < 0.05 \*).



# Supplemental Figure 11

## A *runx1/c-myb*, 36 hpf

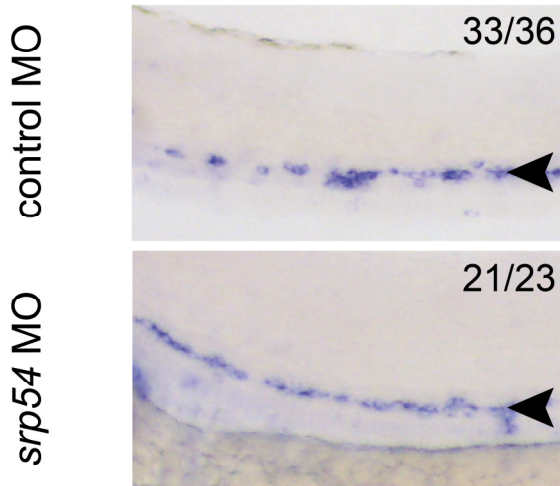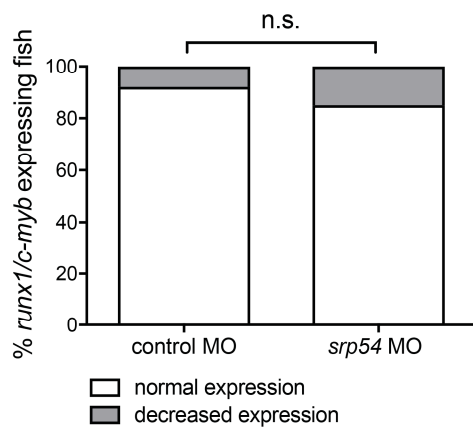

## B *globin*, 48 hpf

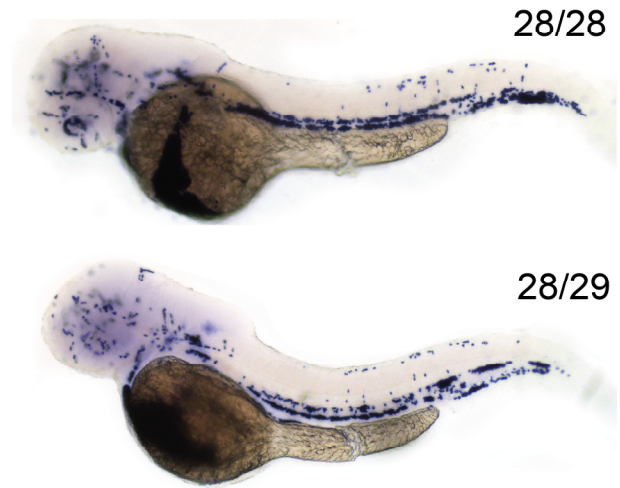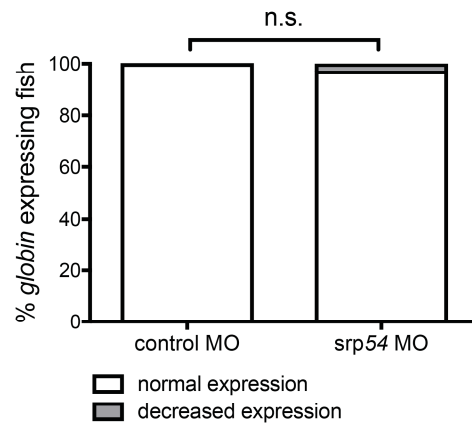

## C body length

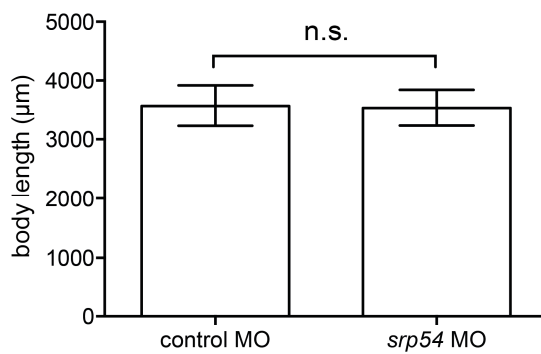

**Supplemental Figure 11. *srp54* knockdown does not influence *c-myb* and globin gene expression or early body size growth.**

Representative pictures of WISH of *runx1/c-myb* at 36 hpf (A) or *globin* at 48 hpf (B) are shown. Note that hematopoietic stem cells (*runx1/c-myb*<sup>+</sup> cells) or erythrocytes (*globin*<sup>+</sup> cells) are not altered upon *srp54* MO knockdown. Graphs display quantitation of results, indicating normal and decreased gene expression. Lateral views are shown, with anterior to the left, dorsal up. Numbers indicate the amount of embryos with the respective phenotype/total number of embryos analyzed in each group **from three independent biological replicate experiments**. (C) Body length assessed at 5 dpf is not affected in *srp54* morphants. Shown are mean values from at least n=10 embryos, **from 3 or more independent biological replicate experiments**. A Mann-Whitney U-test was used to test for statistical significance and error bars are shown as  $\pm$  standard deviation (n.s. = non-significant).
